# Supplementary material for: Long-Term Dietary Supplementation with Betaine Improves Growth Performance, Meat Quality and Intramuscular Fat Deposition in Growing-Finishing Pigs
Source: MDPI journal article supplement (doi:10.3390/foods12030494), 2023-01-20
Supplement: s1 [file s1]

# Supplementary Material

**Table S1.** Primer sequences used for quantitative real-time PCR.

| Gene                            | Forward                         | Reverse                          | Product length(bp) | Accession number |
|---------------------------------|---------------------------------|----------------------------------|--------------------|------------------|
| <i>ACTB</i>                     | 5'-TCTGGCACCACACCTTCT-3'        | 5'-TGATCTGGGTCATCTTCTCAC-3'      | 114                | XM_021086047.1   |
| <i>SREBP-1c</i>                 | 5'-GCGACGGTGCCTCTGGTAGT-3'      | 5'-CGCAAGACGGCGGATTTA-3'         | 218                | XM_021066226.1   |
| <i>H-FABP</i>                   | 5'-ATGACCAAGCCTACCACA -3'       | 5'-AGTTTGCCTCCATCCAGT-3'         | 170                | NM_001099931.1   |
| <i>FASN</i>                     | 5'-AGCCTAACTCCTCGCTGCAAT-3'     | 5'-TCCTTGGAACCGTCTGTGTTC-3'      | 196                | NM_001099930.1   |
| <i>ACC</i>                      | 5'-AGCAAGGTCGAGACCGAAAG-3'      | 5'-TAAGACCACCGGCGGATAGA-3'       | 169                | XM_021066238.1   |
| <i>LPL</i>                      | 5'-CACATTCACCAGAGGGTC-3'        | 5'-TCATGGGAGCACTTCACG-3'         | 177                | XM_021072174.1   |
| <i>PPAR<math>\gamma</math></i>  | 5'-CCAGCATTTCCACTCCACACTA-3'    | 5'-GACACAGGCTCCACTTTGATG-3'      | 124                | XM_005669788.3   |
| <i>SIRT1</i>                    | 5'-TTGATCTTCTCATTGTTATTGGGTC-3' | 5'-ACTTGGAATTAGTGCTACTGGTCTTA-3' | 62                 | NM_001145750.2   |
| <i>PPAR<math>\alpha</math></i>  | 5'-CGACCTGGAAGCCCGTTAT-3'       | 5'-GAGGCTTTGTCCCCACAGAT-3'       | 279                | NM_001044526.1   |
| <i>PGC-1<math>\alpha</math></i> | 5'-GATGTGTCGCCTTCTTGTTTC -3'    | 5'-CATCCTTTGGGGTCTTTGAG-3'       | 93                 | XM_021100444.1   |
| <i>CPT-1</i>                    | 5'-GACAAGTCCTTCACCCTCATCGC-3'   | 5'-GGGTTTGGTTTGCCCAGACAG-3'      | 170                | XM_021091195.1   |
| <i>HSL</i>                      | 5'-GCCTTTCCTGCAGACCATCT-3'      | 5'-CACTGGTGAAGAGGGAGCTG-3'       | 104                | NM_214315.3      |

**Table S2.** Primer sequences of miRNAs and U6 used for real-time PCR

| miRNA                    | Primer sequences                                                                      | Accession number |
|--------------------------|---------------------------------------------------------------------------------------|------------------|
| <i>miR-27a</i>           | F: CGGCGGTTCACAGTGGCTAAG<br>RT: GTCGTATCCAGTGCAGGGTCCGAGGTATTCGCACTGGATACGACGCGGAA    | MIMAT0002148     |
| <i>miR-181a</i>          | F: CGGCGAACATTCAACGCTGTCGG<br>RT: GTCGTATCCAGTGCAGGGTCCGAGGTATTCGCACTGGATACGACAACTCA  | MIMAT0010191     |
| <i>miR-143-3p</i>        | F: CGCTGAGTTGAGATGAAGCACTG<br>RT: GTCGTATCCAGTGCAGGGTCCGAGGTATTCGCACTGGATACGACGAGCTA  | MIMAT0013879     |
| <i>miR-370</i>           | F: CCGGCCTGCTGGGGTGGG<br>RT: GTCGTATCCAGTGCAGGGTCCGAGGTATTCGCACTGGATACGACACCAGG       | MIMAT0025373     |
| <i>miR-122</i>           | F: CGCGGTGGAGTGTGACAATGG<br>RT: GTCGTATCCAGTGCAGGGTCCGAGGTATTCGCACTGGATACGACACAAAC    | MIMAT0002119     |
| <i>miR-26a</i>           | F: CGCGCGCGTTCAAGTAATCCAGGA<br>RT: GTCGTATCCAGTGCAGGGTCCGAGGTATTCGCACTGGATACGACAGCCTA | MIMAT0002135     |
| <i>miR-21</i>            | F: CGGCGGTAGCTTATCAGACTGA<br>RT: GTCGTATCCAGTGCAGGGTCCGAGGTATTCGCACTGGATACGACTCAACA   | MIMAT0002165     |
| Universal reverse primer | R: ATCCAGTGCAGGGTCCGAGG<br>F: CTCGCTTCGGCAGCACA                                       |                  |
| U6                       | R: AACGCTTCACGAATTTGCGT<br>RT: AACGCTTCACGAATTTGCGT                                   |                  |
